# Supplementary material for: Nitrogen and titanium-codoped porous carbon nanocomposites derived from metal–organic framework as cathode to address polysulfides shuttle effects by Ti-assisted N-inhibiting strategy
Source: Royal Society of Chemistry journal article supplement (doi:10.1039/d2ra06372g), 2022-01-01
Supplement: d2ra06372g1.pdf [file d2ra06372g1.pdf]

## Supporting Information

### Nitrogen and titanium-codoped porous carbon nanocomposites derived from metal-organic framework as cathode to address polysulfides shuttle effects by Ti-assisted N-inhibiting strategy

Meng-Ting Li,<sup>a,b\*</sup> Jun Chen,<sup>a</sup> Ke Ren,<sup>a</sup> Xian-Hong Li,<sup>a</sup> Hai-Yang Gao,<sup>a</sup> Da-Qiang Sun,<sup>b</sup> and Yang Yu<sup>\*a</sup>

a. College of Chemistry and Chemical Engineering, Qufu Normal University, Qufu, 273165, People's Republic of China.  
E-mail: limt0205@qfnu.edu.cn

b. Shandong Sacred Sun Power Sources Co.,Ltd. No.1,Shengyang Road,Qufu,Shandong 273100,China

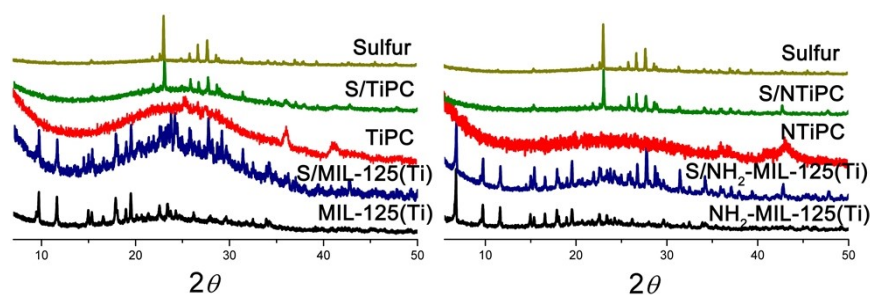

**Figure S1** XRD patterns of sulfur, MIL-125(Ti), NH<sub>2</sub>-MIL-125(Ti), S/MIL-125(Ti), S/NH<sub>2</sub>-MIL-125(Ti), TiPC, S/TiPC and S/NTiPC composites.

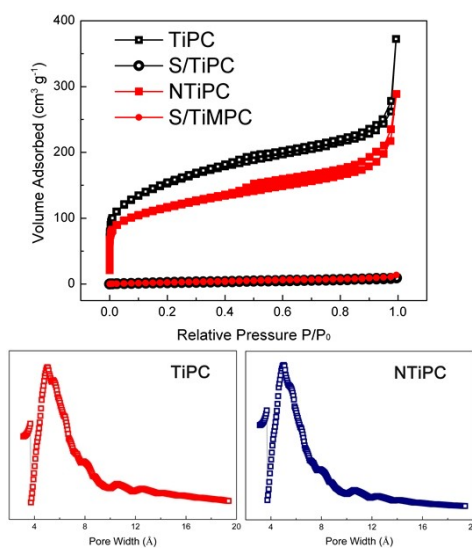

**Figure S2** Nitrogen isotherms recorded at 77 K for TiPC, NTiPC S/TiPC and S/NTiPC. And the pore size distributions of TiPC and N TiPC obtained by Original Density Functional Theory method.

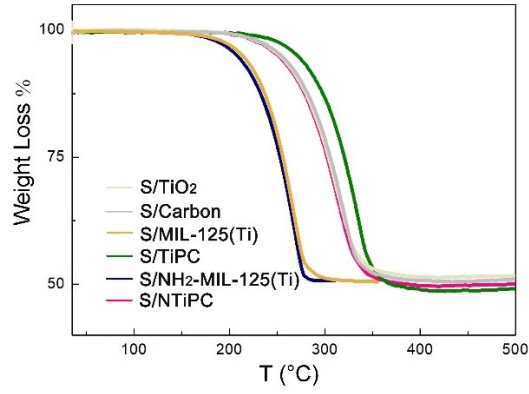

**Figure S3** TGA of S/TiO<sub>2</sub>, S/Carbon, S/MIL-125(Ti), S/TiPC, S/NH<sub>2</sub>-MIL-125(Ti) and S/NTiPC.

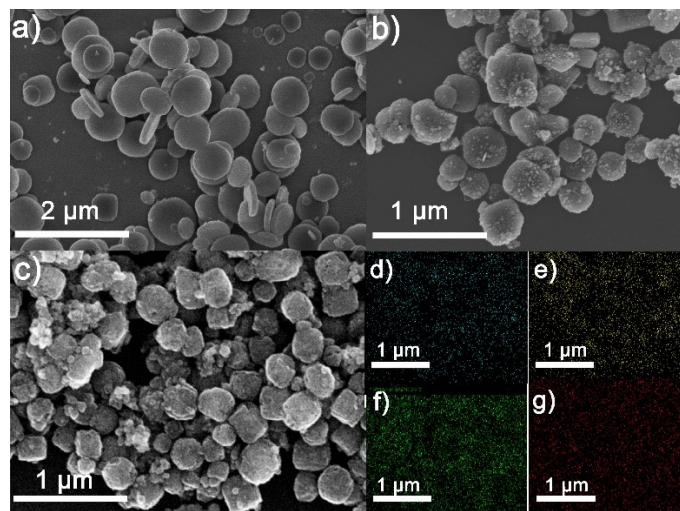

**Figure S4** (a), (b) and (c) SEM images of MIL-125(Ti), TiPC and S/TiPC, respectively. The elemental mapping of (d) carbon, (e) oxygen, (f) titanium and (g) sulfur of S/TiPC.

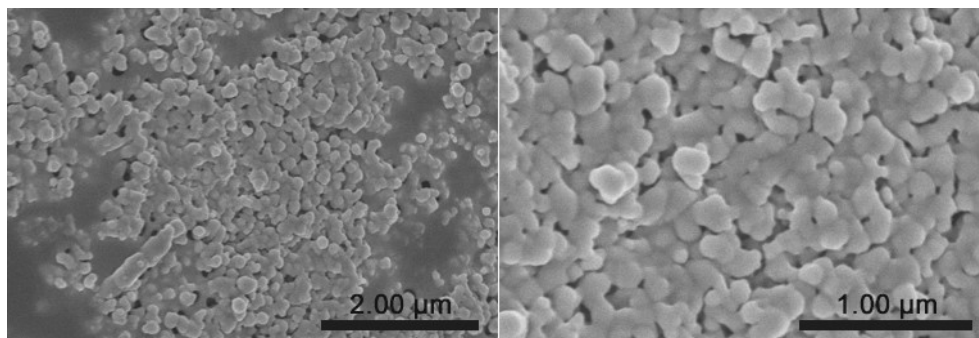

**Figure S5** SEM images of S/NTiPC cathode after few cycles of discharge/charge cycling.

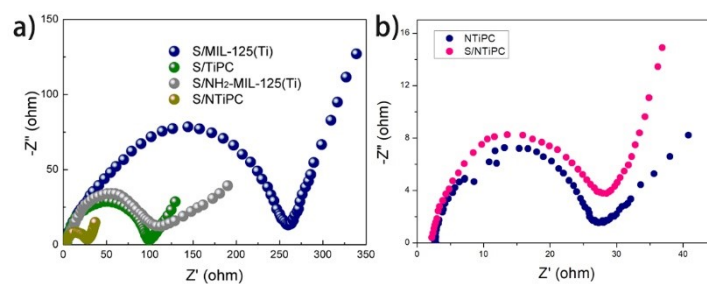

**Figure S6** EIS of a) S/MIL-125(Ti), S/TiPC, S/NH<sub>2</sub>-MIL-125(Ti) and S/NTiPC cathodes, b) NTiPC and S/NTiPC cathodes in Li-S battery before cycling performance.

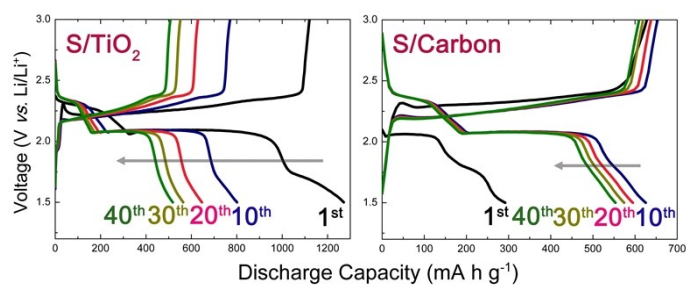

**Figure S7** Discharge/charge curves of the S/TiO<sub>2</sub>, S/Carbon cathodes at different cycles at 0.5 C.

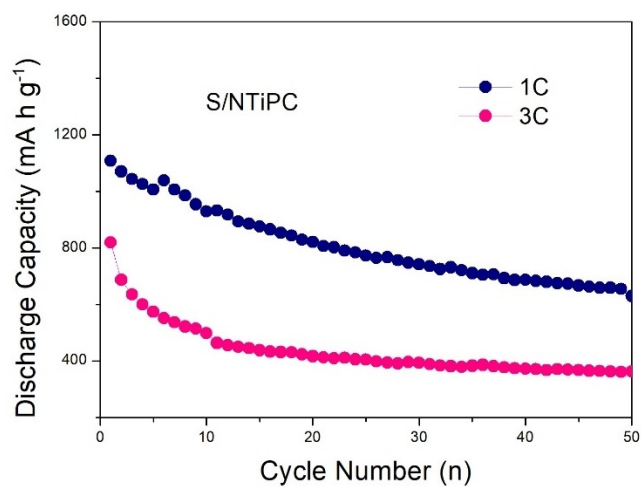

**Figure S8** The discharge capacity of S/NTiPC cathode at 1 C and 3C.

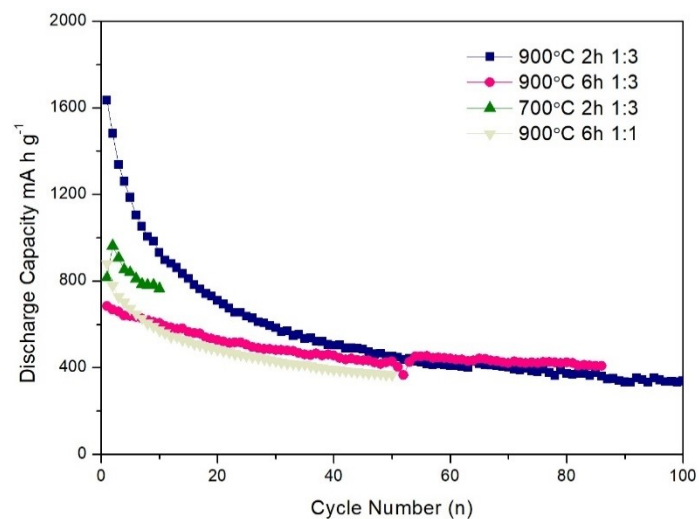

**Figure S9** The discharge capacity of S/NTiPC cathodes under different conditions at 0.5 C.

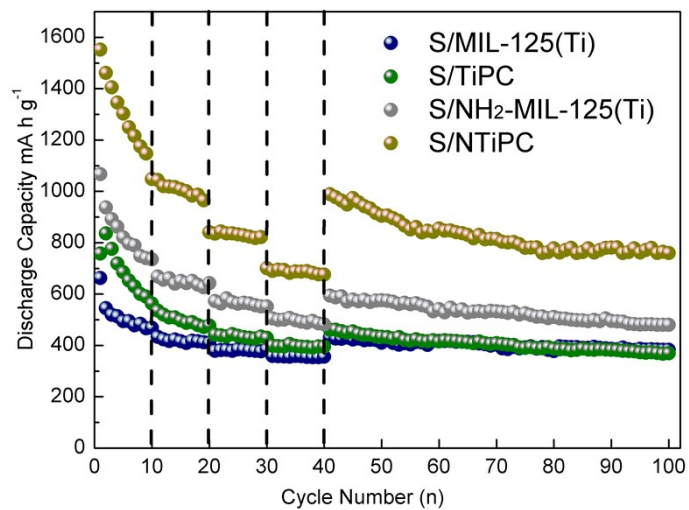

**Figure S10** The S/MIL-125(Ti), S/TiPC, S/NH<sub>2</sub>-MIL-125(Ti) and S/NTiPC cathodes at various C-rates.
